# Supplementary material for: Cholesterol linked benzothiazole: a versatile gelator for detection of picric acid and metal ions such as Ag+, Hg2+, Fe3+ and Al3+ under different conditions
Source: Royal Society of Chemistry journal article supplement (doi:10.1039/c9nj01282f), 2019-01-01

## Supporting Information

### Cholesterol linked benzothiazole: A versatile gelator for detection of picric acid and metal ions such as Ag<sup>+</sup>, Hg<sup>2+</sup>, Fe<sup>3+</sup> and Al<sup>3+</sup> under different conditions

Subhendu Mondal, Rameez Raza and Kumares Ghosh\*

Department of Chemistry, University of Kalyani, Kalyani-741235, India. Email: ghosh\_k2003@yahoo.co.in,  
kumareschem18@klyuniv.ac.in

**Table S1:** Results of gelation test for **1**

| Solvent                                          | <b>1</b>                                        |
|--------------------------------------------------|-------------------------------------------------|
| CHCl <sub>3</sub>                                | S                                               |
| DCM                                              | S                                               |
| Nitrobenzene                                     | G (mgc = 18 mg/mL,<br>T <sub>gel</sub> = 44 °C) |
| Benzene                                          | G (mgc = 56 mg/mL,<br>T <sub>gel</sub> = 40 °C) |
| 1,4-Dioxane                                      | G (mgc = 25 mg/mL,<br>T <sub>gel</sub> = 52 °C) |
| Toluene                                          | G (mgc = 45 mg/mL,<br>T <sub>gel</sub> = 42 °C) |
| MeOH                                             | I                                               |
| CH <sub>3</sub> CN                               | I                                               |
| CHCl <sub>3</sub> – MeOH (1:1, v/v)              | I                                               |
| DMSO                                             | I                                               |
| CHCl <sub>3</sub> -PET ether (1:1,v/v)           | I                                               |
| Cyclohexane                                      | PS                                              |
| n-Hexane                                         | I                                               |
| Diethyl ether                                    | I                                               |
| Acetone                                          | PS                                              |
| THF                                              | S                                               |
| DMF                                              | G (mgc = 10 mg/mL,<br>T <sub>gel</sub> = 50 °C) |
| DMF : H <sub>2</sub> O (1:1, v/v)                | P                                               |
| MeOH : H <sub>2</sub> O (1:1, v/v)               | I                                               |
| CH <sub>3</sub> CN : H <sub>2</sub> O (1:1, v/v) | I                                               |

S = solution; G = gel; I = insoluble; PS = partially soluble; PG = partial gelation. Gelation studies were carried out by taking 60 mg of compound **1** in 1 mL of each solvent. Gels were primarily characterized by inversion of vial method after ~5 min of sample preparation.

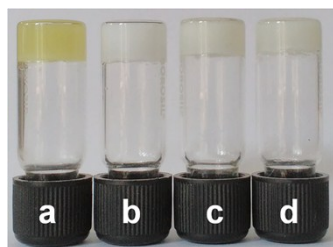

**Fig S1.** Pictorial representation of gel of **1** in (a) nitrobenzene, (b) DMF, (c) toluene and (d) benzene.

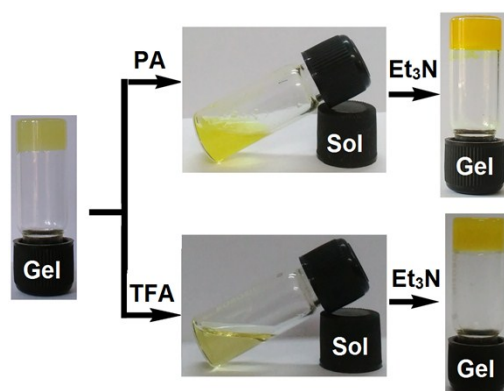

**Fig S2.** Photograph representing the phase change of the nitrobenzene gel of **1** (20 mg/mL) upon successive addition of 1 equiv. amount of picric (PA), trifluoroacetic acid (TFA) and Et<sub>3</sub>N.

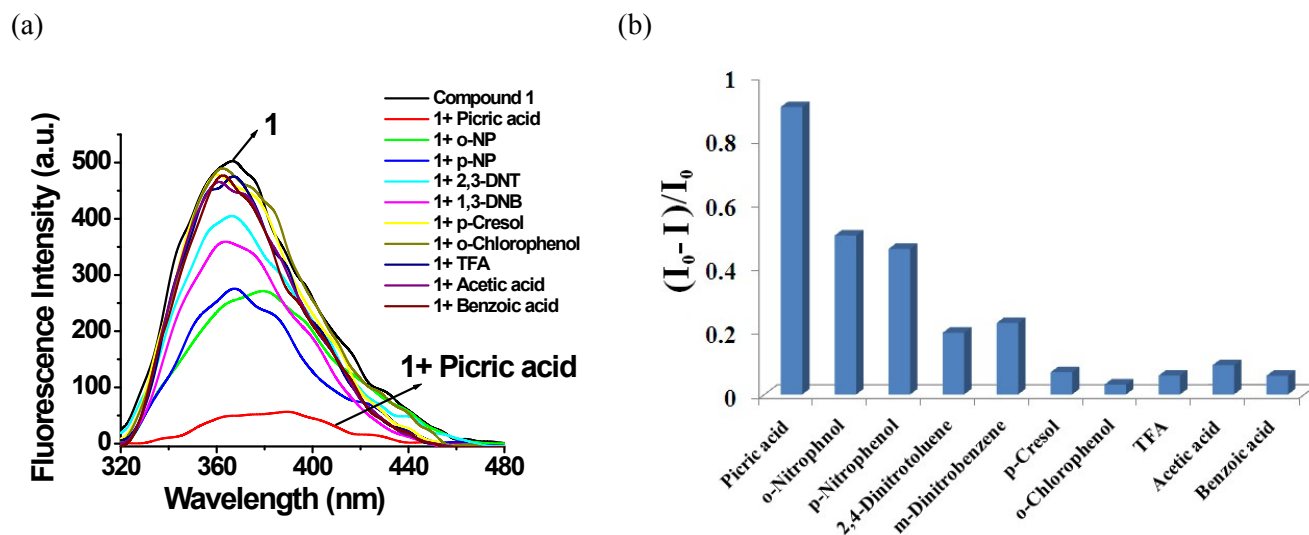

**Fig S3.** Change in (a) emission and (b) fluorescence ratio  $[I - I_0/I_0]$  of **1** ( $c = 2.50 \times 10^{-5}$  M) upon addition of 12 equiv. amounts of different guests ( $c = 1.0 \times 10^{-3}$  M) in CH<sub>3</sub>CN containing 1% CHCl<sub>3</sub>.

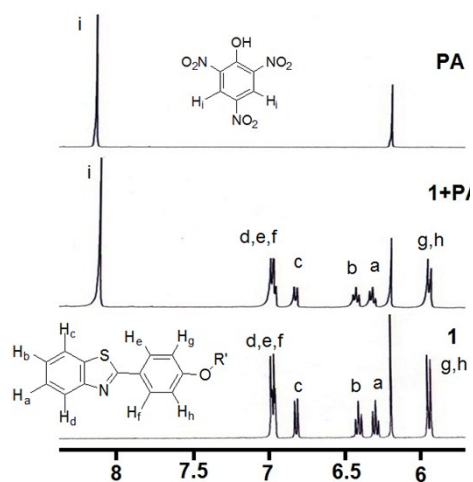

**Fig S4.** Partial  $^1\text{H}$  NMR (400 MHz) of **1** ( $c = 3.07 \times 10^{-3}$  M) in absence and presence of 1 equiv. amount of PA.

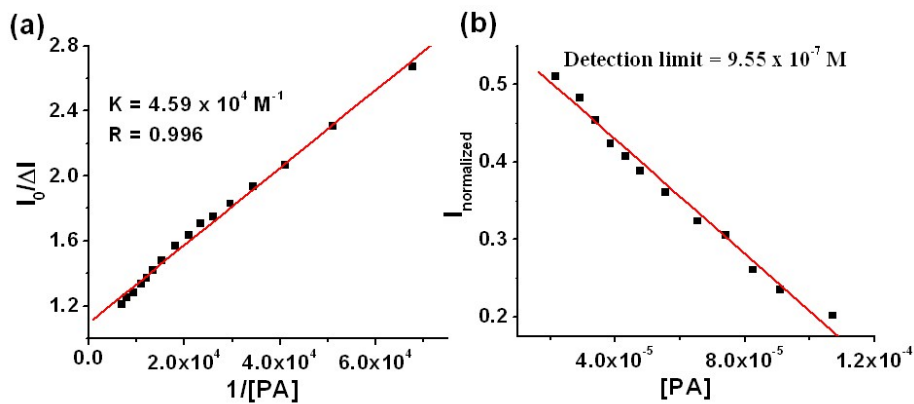

**Fig S5.** (a) Benesi-Hildebrand plot and (b) detection limit of **1** for with picric acid ( $c = 1 \times 10^{-3}$  M) in  $\text{CH}_3\text{CN}$  containing 1%  $\text{CHCl}_3$ .

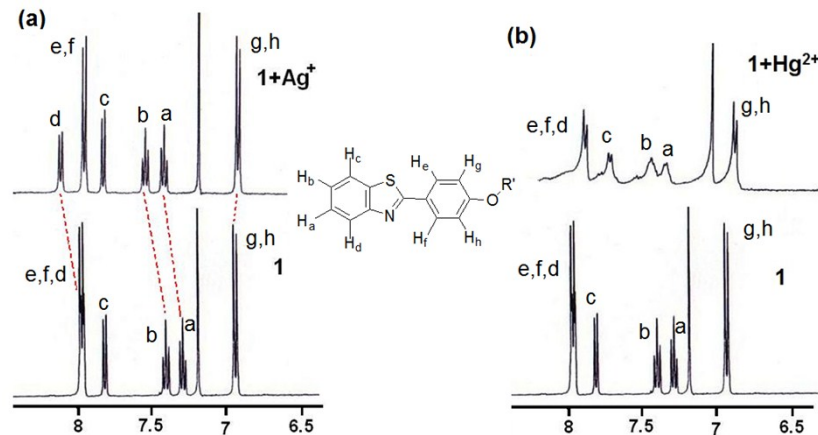

**Fig S6.** Partial  $^1\text{H}$  NMR (400 MHz) of **1** ( $c = 3.07 \times 10^{-3}$  M) in absence and presence of 1 equiv. amount of (a)  $\text{Ag}^+$  and (b)  $\text{Hg}^{2+}$  in  $\text{CDCl}_3$ .

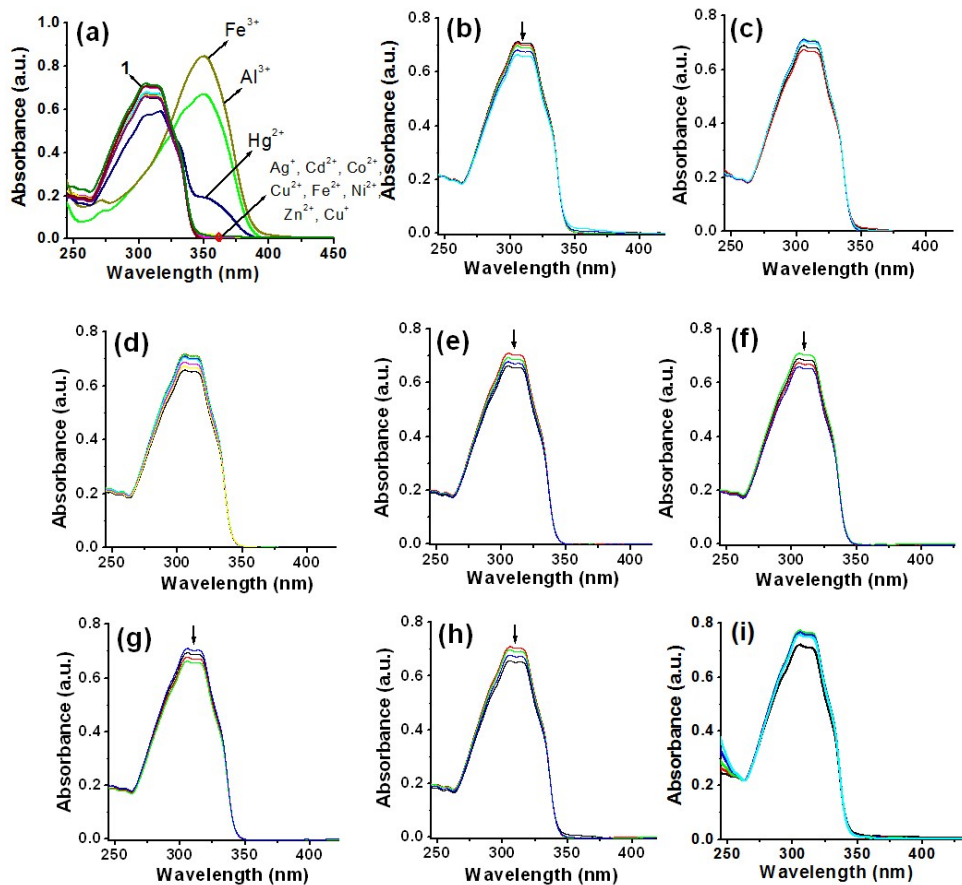

**Fig S7.** Change in UV-vis spectra of **1** with addition of 3 equiv. amounts of (a) all the metal ions, (b)  $\text{Fe}^{2+}$ , (c)  $\text{Cu}^{2+}$ , (d)  $\text{Ag}^+$  (e)  $\text{Co}^{2+}$ , (f)  $\text{Ni}^{2+}$ , (g)  $\text{Zn}^{2+}$ , (h)  $\text{Cd}^{2+}$  and (i)  $\text{Cu}^+$  ( $c = 1 \times 10^{-3}$  M) in  $\text{CH}_3\text{CN}$  containing 1%  $\text{CHCl}_3$ .

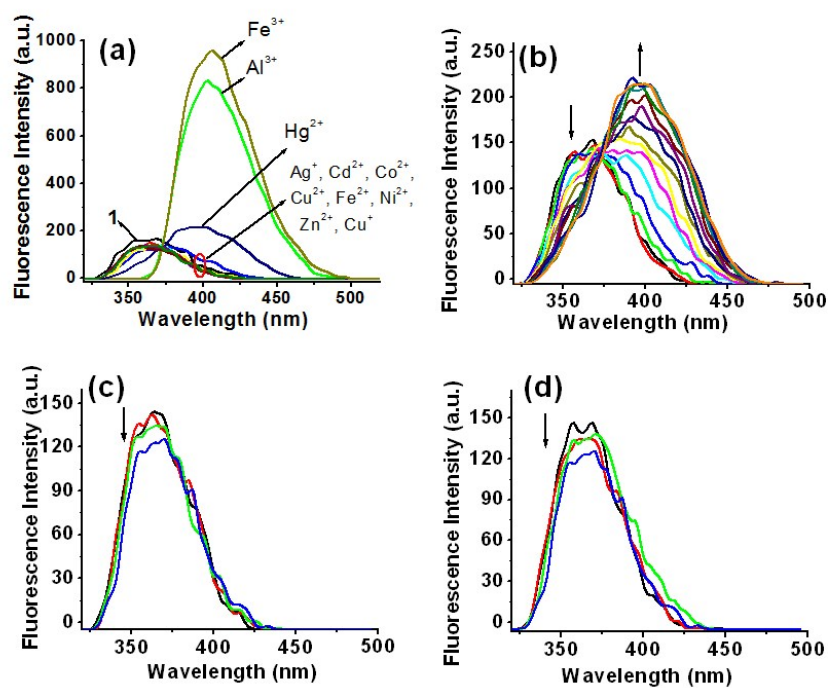

**Fig S8.** Change in emission of **1** with addition of 3 equiv. amounts of (a) all the metal ions, (b)  $\text{Hg}^{2+}$ , (c)  $\text{Cu}^{2+}$  and (d)  $\text{Fe}^{2+}$  ( $c = 1 \times 10^{-3}$  M) in  $\text{CH}_3\text{CN}$  containing 1%  $\text{CHCl}_3$ .

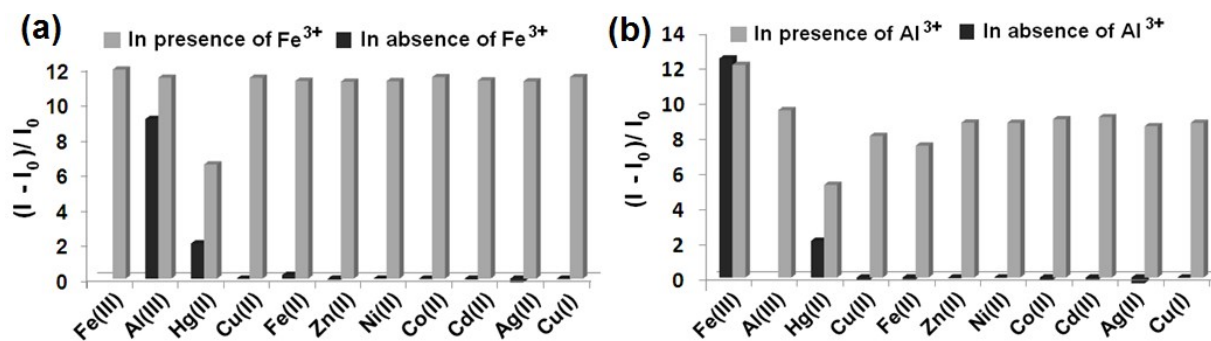

**Fig S9.** Change in fluorescence ratios of **1** ( $c = 2.5 \times 10^{-5}$  M) with (a)  $\text{Fe}^{3+}$  and (b)  $\text{Al}^{3+}$  ( $c = 1 \times 10^{-3}$  M) in the absence and presence of 3 equiv. amounts of different metal ions in  $\text{CH}_3\text{CN}$  containing 1%  $\text{CHCl}_3$ .

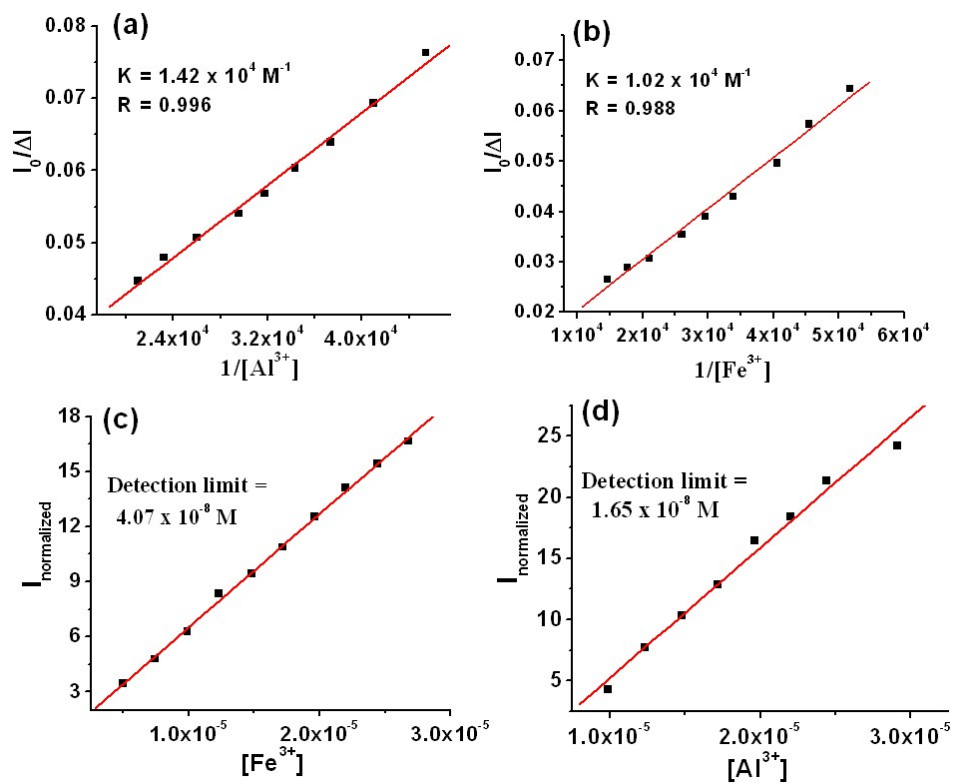

**Fig S10.** Benesi-Hildebrand plots of **1** with (a)  $\text{Fe}^{3+}$  and (b)  $\text{Al}^{3+}$ ; Detection limit plots of **1** for (c)  $\text{Fe}^{3+}$  and (d)  $\text{Al}^{3+}$  ( $c = 1 \times 10^{-3} \text{ M}$ ) in  $\text{CH}_3\text{CN}$  containing 1%  $\text{CHCl}_3$ .

**Table S2:** Reported PA sensors in gel phase

| Entry    | Structure of compounds                                                                                                               | Medium of Gelation                                          | Sensing                                                      | Ref.                                                        |
|----------|--------------------------------------------------------------------------------------------------------------------------------------|-------------------------------------------------------------|--------------------------------------------------------------|-------------------------------------------------------------|
| 1        | 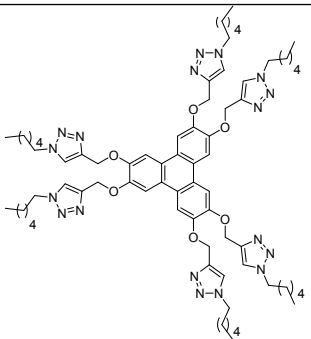                                                    | Cyclohexane and DCM/Haxane (1:4)                            | Detection of picric acid vapor through gel to sol transition | <i>Langmuir</i> 2011, <b>27</b> , 15275.                    |
| 2        |                                                     | Toluene/DCM (8:2), Benzene/DCM (8:2) and o-Xylene/DCM (8:2) | Detection of picric acid through gel to sol transition       | <i>ACS Appl. Mater. Interfaces</i> 2013, <b>5</b> , 672–679 |
| 3        |                                                   | THF                                                         | Detection of picric acid through gel to sol transition       | <i>Appl. Mater. Interfaces</i> 2013, <b>5</b> , 8394        |
| 4        | $\begin{array}{c} \text{H}_2\text{N} \\ \diagdown \\ \text{C}=\text{S} \\ \diagup \\ \text{H}_2\text{N} \end{array} + \text{CuCl}_2$ | Water                                                       | Detection of picric acid through gel to sol transition       | <i>ACS Appl. Mater. Interfaces</i> 2014, <b>6</b> , 6308    |
| 5        |                                                   | Nitrobenzene, Toluene, benzene and 1,2-dichlorobenzene      | Detection of picric acid through gel to sol transition       | <i>ChemistrySelect</i> 2017, <b>2</b> , 4800.               |
| 6        |                                                   | DMSO                                                        | Detection of picric acid through gel to sol transition       | <i>New J. Chem.</i> 2018, <b>42</b> , 5382-5394             |
| Our Work |                                                   | Nitrobenzene                                                | Detection of picric acid through gel to sol transition       |                                                             |

**Table S3:** List of different Hg<sup>2+</sup> ion responsive supramolecular gelators

| Entry | Structure                                                                           | Solvent                                           | Phase transformation in presence of Hg <sup>2+</sup> ions | Interfering metal ions             | Detection limit for Hg <sup>2+</sup> (M) | Ref.                                                 |
|-------|-------------------------------------------------------------------------------------|---------------------------------------------------|-----------------------------------------------------------|------------------------------------|------------------------------------------|------------------------------------------------------|
| 1     | 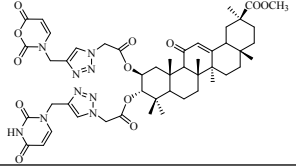   | 1,2-dichloroethane                                | Gel to Sol                                                | -                                  | -                                        | <i>Org. Lett.</i> , 2011, <b>13</b> , 3372.          |
| 2     |    | 1,2-dichloroethane                                | Gel to Sol                                                | -                                  | -                                        | <i>New J. Chem.</i> , 2013, <b>37</b> , 2419.        |
| 3     |    | CHCl <sub>3</sub> :CH <sub>3</sub> O H (2:1, v/v) | Gel to Sol                                                | Cu <sup>2+</sup> , Ag <sup>+</sup> | -                                        | <i>New. J. Chem.</i> , 2016, <b>40</b> , 3476.       |
| 4     |   | 0.2 N HCl                                         | Sol to gel                                                | -                                  | -                                        | <i>Chem. Commun.</i> , 2014, <b>50</b> , 734.        |
| 5     |  | DMSO : H <sub>2</sub> O = (1 : 6, v/v)            | Gel to Sol                                                | Cu <sup>2+</sup> , Ag <sup>+</sup> | 2.02 x 10 <sup>-6</sup>                  | <i>Mater. Chem. Front.</i> , 2018, <b>2</b> , 385.   |
| 6     |  | DMF : H <sub>2</sub> O = (1 : 1, v/v)             | Gel to Sol                                                | Cu <sup>2+</sup>                   | 2.61 x 10 <sup>-6</sup>                  | <i>New. J. Chem.</i> , 2018, <b>42</b> , 13718-13725 |
| 7     |  | DMF : H <sub>2</sub> O = (1 : 1, v/v)             | Sol to gel<br>Chemodosimetric approach                    | -                                  | 5.71 x 10 <sup>-6</sup>                  | <i>Supramol. Chem.</i> , 2018, <b>30</b> , 722.      |
| 8     |  | DMF : H <sub>2</sub> O = (1 : 1, v/v)             | Sol to gel<br>Chemodosimetric approach                    | -                                  | 5.51 x 10 <sup>-6</sup>                  | <i>New J. Chem.</i> , 2019, DOI: 10.1039/c8nj05056b  |
|       |  | Nitrobenzene                                      | Gel to Sol                                                | -                                  | -                                        | <i>Present work</i>                                  |



**Table S4:** List of different Ag<sup>+</sup> ion responsive supramolecular gelators

| Entry | Structure                                                                           | Solvent                                                   | Phase transformation in presence of Ag <sup>+</sup> ions | Interfering metal ions | Detection limit for Ag <sup>+</sup> (M) | Ref.                                              |
|-------|-------------------------------------------------------------------------------------|-----------------------------------------------------------|----------------------------------------------------------|------------------------|-----------------------------------------|---------------------------------------------------|
| 1     | 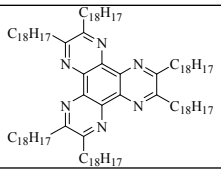   | EtOH                                                      | Gel to sol                                               | -                      | -                                       | <i>Tetrahedron Lett.</i> 2012, <b>53</b> , 1840.  |
| 2     |    | MeOH                                                      | Sol to gel                                               | -                      | -                                       | <i>Chem. Commun.</i> 2013, <b>49</b> , 4181.      |
| 3     |    | MeOH:H <sub>2</sub> O (1:1, v/v)                          | Sol to gel                                               | -                      | -                                       | <i>Supramol. Chem.</i> 2014, <b>26</b> , 39.      |
| 4     |    | THF/ H <sub>2</sub> O                                     | Sol to gel                                               | -                      | -                                       | <i>Soft Matter</i> , 2011, <b>7</b> , 2412.       |
| 5     |   | H <sub>2</sub> O                                          | Sol to gel                                               | -                      | -                                       | <i>Soft Matter</i> , 2012, <b>8</b> , 6557.       |
| 6     |  | DMF: H <sub>2</sub> O (2:3, v/v)                          | Sol to gel                                               | -                      | -                                       | <i>Cryst. Growth Des.</i> 2015, <b>15</b> , 4635. |
| 7     |  | CH <sub>2</sub> Cl <sub>2</sub> , CHCl <sub>3</sub> , THF | Sol to gel                                               | -                      | -                                       | <i>Langmuir</i> , 2012, <b>28</b> , 27.           |
| 8     |  | Toluene: EtOH (99:1, v/v)                                 | Sol to gel                                               | -                      | -                                       | <i>Chem. Commun.</i> 2015, <b>51</b> , 13929.     |
| 9     |  | DMF, DMF/ H <sub>2</sub> O, DMSO/ H <sub>2</sub> O        | Sol to gel                                               | -                      | -                                       | <i>Cryst. Growth Des.</i> 2015, <b>15</b> , 5360. |
| 10    |  | EtOAc                                                     | Gel to sol                                               | Li <sup>+</sup>        | -                                       | <i>Chem. Commun.</i> 2012, <b>48</b> , 2767.      |

|    |                                                                                                                                                                 |                                                                                                                  |                                                      |                                                                   |                                                                                                          |                                                    |
|----|-----------------------------------------------------------------------------------------------------------------------------------------------------------------|------------------------------------------------------------------------------------------------------------------|------------------------------------------------------|-------------------------------------------------------------------|----------------------------------------------------------------------------------------------------------|----------------------------------------------------|
| 11 | 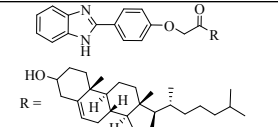                                                                               | DMF : H <sub>2</sub> O<br>(1:1, v/v)                                                                             | Sol to gel                                           | -                                                                 | 4.31 x 10 <sup>-5</sup>                                                                                  | <i>ChemistrySe lect</i> , 2017, <b>2</b> , 959.    |
| 12 |  <p>a. X = Y = CH; Z = N<br/>b. X = Z = CH; Y = N<br/>c. Y = Z = CH; X = N</p> | DMSO:<br>H <sub>2</sub> O                                                                                        | Sol to gel                                           | -                                                                 | -                                                                                                        | <i>Dalton Trans.</i> , 2017, <b>46</b> , 2793.     |
| 13 |                                                                                | Toluene/ethanol (10:1, v/v)                                                                                      | Sol to gel                                           | -                                                                 | -                                                                                                        | <i>Langmuir</i> , 2007, <b>23</b> , 8217.          |
| 14 |                                                                                | Diphenyl ether                                                                                                   | Sol to gel                                           | -                                                                 | -                                                                                                        | <i>Chem. Lett.</i> , 2003, <b>32</b> , 12.         |
| 15 |                                                                                | THF-H <sub>2</sub> O (3 : 2)                                                                                     | Sol to gel                                           | -                                                                 | -                                                                                                        | <i>New J. Chem.</i> , 2010, <b>34</b> , 2261.      |
| 16 |                                                                               | H <sub>2</sub> O                                                                                                 | Sol to gel                                           | -                                                                 | -                                                                                                        | <i>New J. Chem.</i> , 2014, <b>38</b> , 2470.      |
| 17 |                                                                              | CHCl <sub>3</sub> :CH <sub>3</sub> OH (2:1, v/v)                                                                 | Gel to Sol                                           | Cu <sup>2+</sup> , Hg <sup>2+</sup>                               | -                                                                                                        | <i>New. J. Chem.</i> , 2016, <b>40</b> , 3476.     |
| 18 |                                                                              | DMSO:<br>H <sub>2</sub> O (1:1, v/v)                                                                             | Sol to gel                                           | Cu <sup>2+</sup><br>-                                             | -<br>-                                                                                                   | <i>New. J. Chem.</i> , 2018, <b>42</b> , 6488.     |
| 19 |                                                                              | DMSO:<br>H <sub>2</sub> O<br>DMSO:<br>H <sub>2</sub> O<br>DMSO:<br>H <sub>2</sub> O<br>DMSO:<br>H <sub>2</sub> O | Gel to sol<br>Gel to sol<br>Sol to gel<br>Sol to gel | Cu <sup>2+</sup><br>Cu <sup>2+</sup> , Hg <sup>2+</sup><br>-<br>- | 3.69 x 10 <sup>-6</sup><br>3.34 x 10 <sup>-6</sup><br>1.93 x 10 <sup>-7</sup><br>1.28 x 10 <sup>-6</sup> | <i>Mater. Chem. Front.</i> , 2018, <b>2</b> , 385. |

|    |                                                                                                                                                                                                  |                                                                                 |                                     |                   |                                                                                 |                                                           |
|----|--------------------------------------------------------------------------------------------------------------------------------------------------------------------------------------------------|---------------------------------------------------------------------------------|-------------------------------------|-------------------|---------------------------------------------------------------------------------|-----------------------------------------------------------|
| 20 | 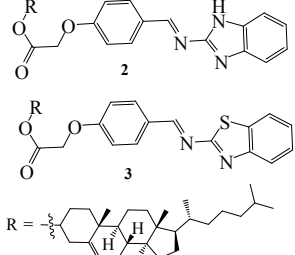 <p>2</p> <p>3</p> <p>R = </p> | <p>1,4-dioxane-MeOH (1:1, v/v)</p> <p>1,4-dioxane-H<sub>2</sub>O (1:1, v/v)</p> | <p>Gel to sol</p> <p>Sol to gel</p> | <p>-</p> <p>-</p> | <p><math>3.27 \times 10^{-5}</math></p> <p><math>9.27 \times 10^{-5}</math></p> | <p><i>New J. Chem.</i>, 2019, DOI: 10.1039/c8nj05056b</p> |
|    |                                                                                                                 | Nitrobenzene                                                                    | Gel to Sol                          | -                 |                                                                                 | <i>Present work</i>                                       |

**<sup>1</sup>H NMR (CDCl<sub>3</sub>, 400 MHz) of 1**

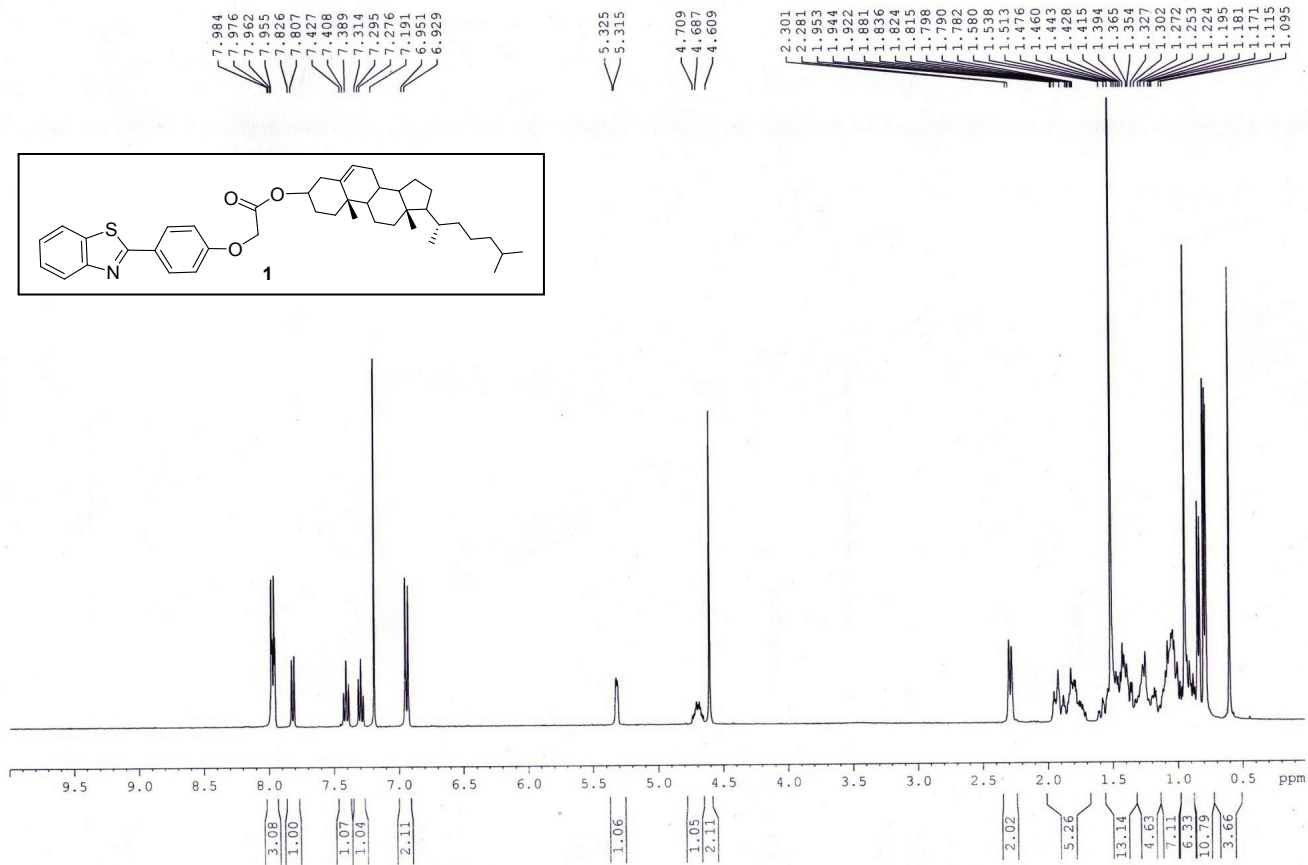

**<sup>13</sup>C NMR (CDCl<sub>3</sub>, 100 MHz) of 1**

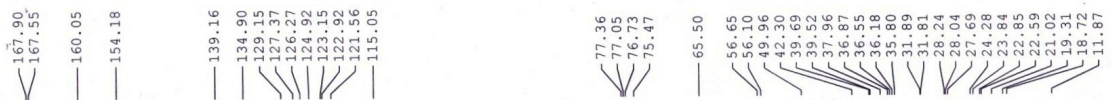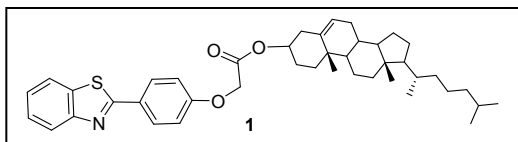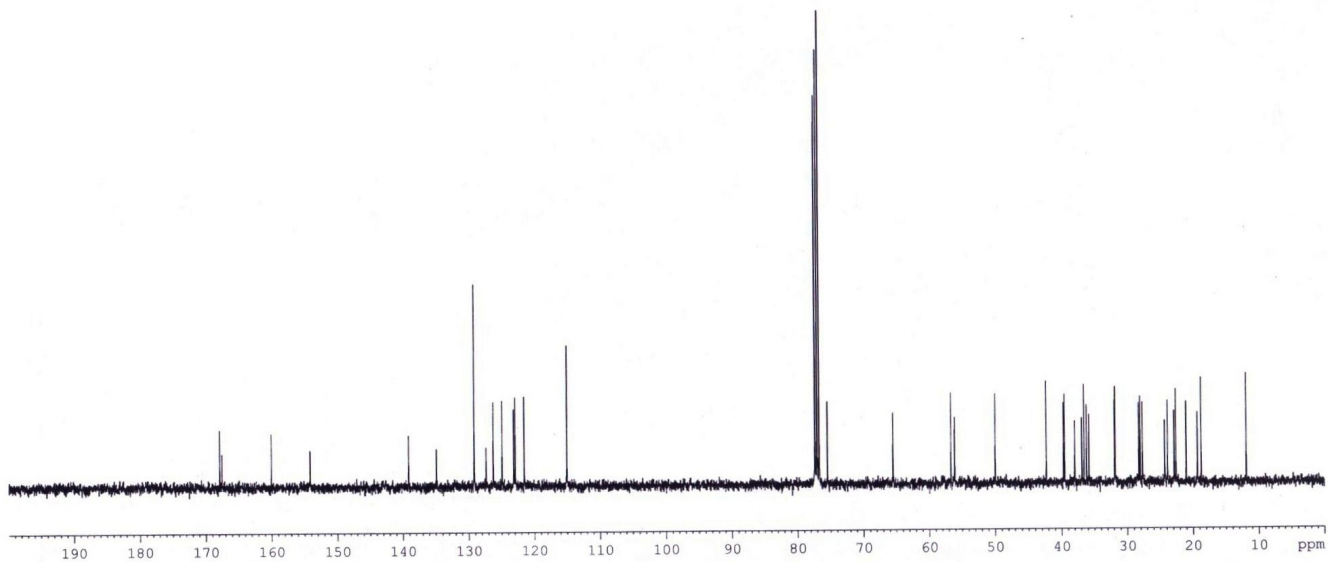

## Mass spectrum of 1.

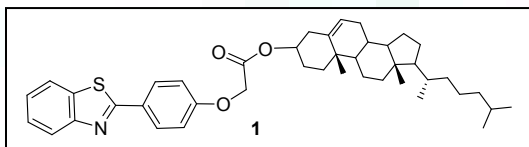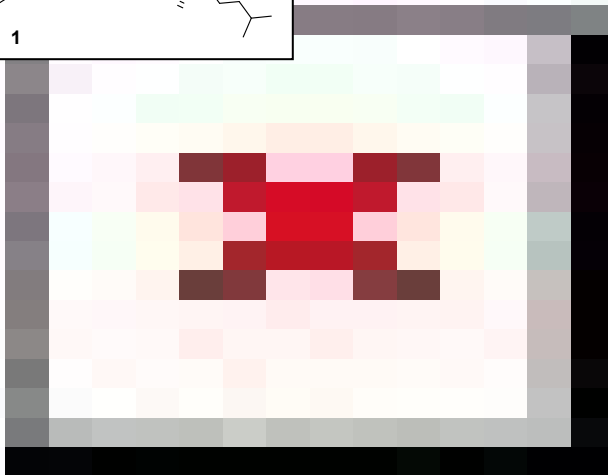

**$^1\text{H}$  NMR ( $\text{CDCl}_3$  containing 8%  $d_6$ -DMSO, 400 MHz) of 3**

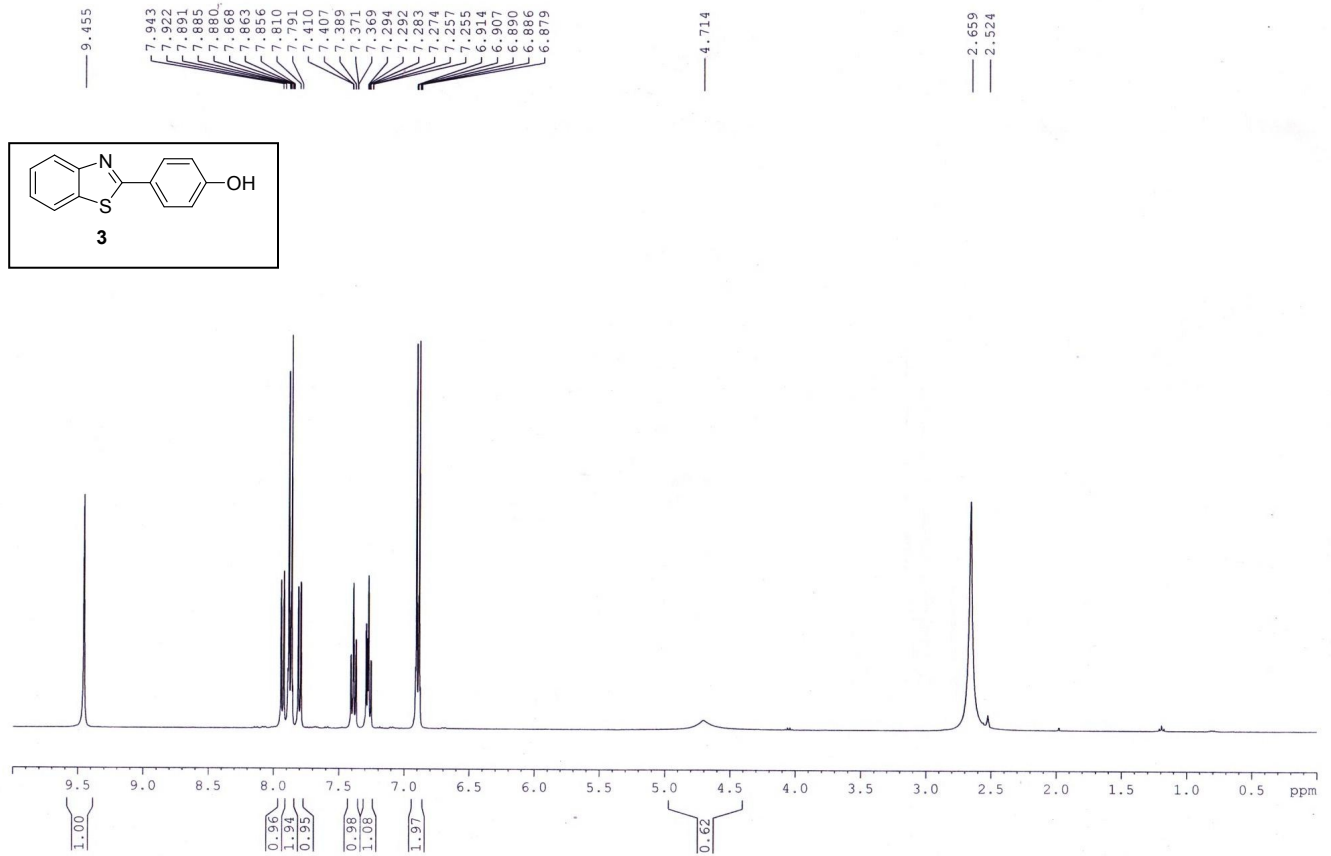

**$^{13}\text{C}$  NMR (CDCl<sub>3</sub> containing 8% *d*<sub>6</sub>-DMSO, 100 MHz) of 3**

168.35

160.29

154.02

134.56

129.11

126.08

124.84

124.59

122.43

121.44

116.07

77.61

77.29

76.97

40.49

40.27

40.07

39.86

39.65

39.44

39.23

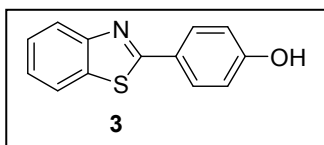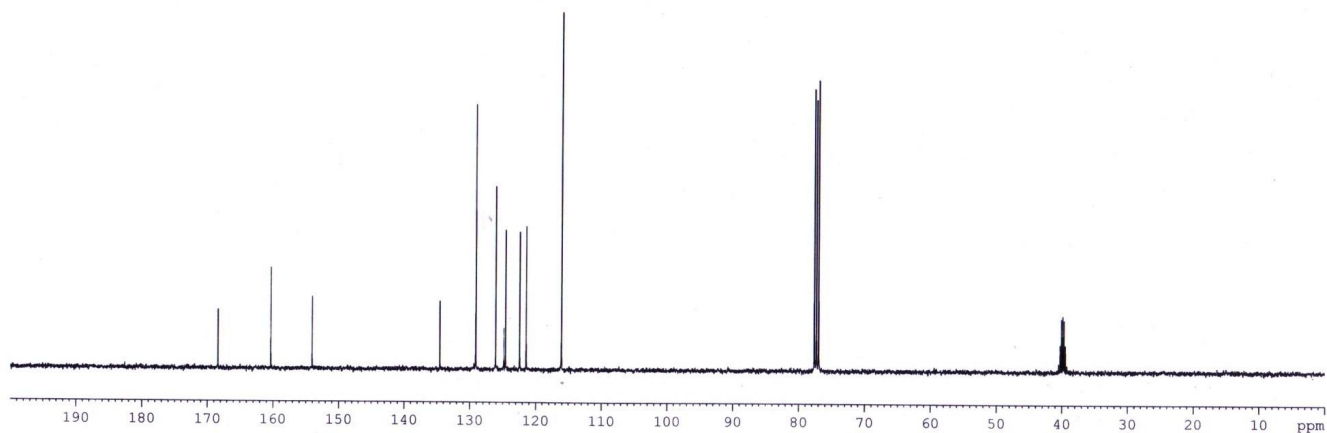



## Mass spectrum of 3

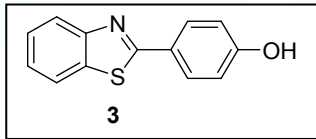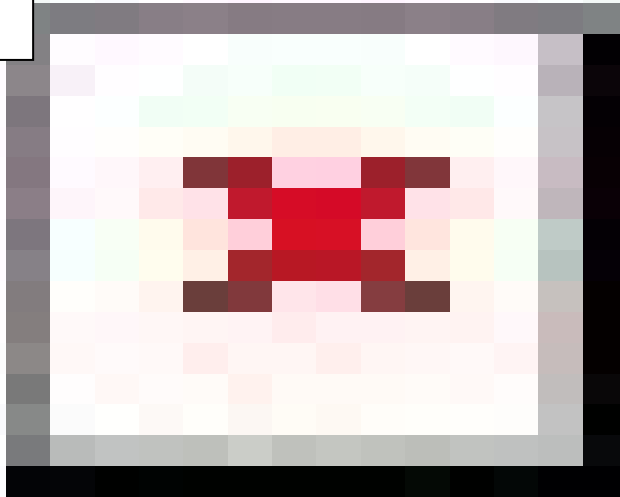

Supplement: c9nj01282f1.pdf [file c9nj01282f1.pdf]
